# Supplementary material
Source: Springer Nature journal article supplement (https://www.springermedizin.de/resource/supplementary/13058_2010_9477_MOESM9_ESM.pdf/9702238)
Supplement: MOESM9 [file 9702238]

A

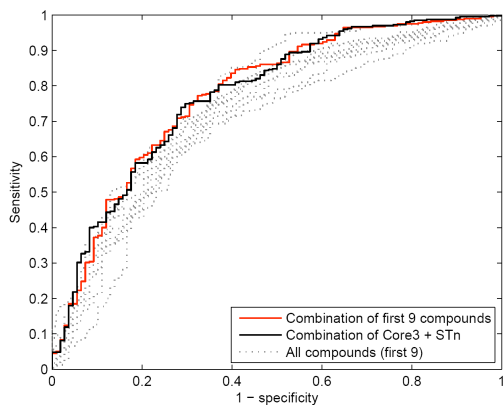

B

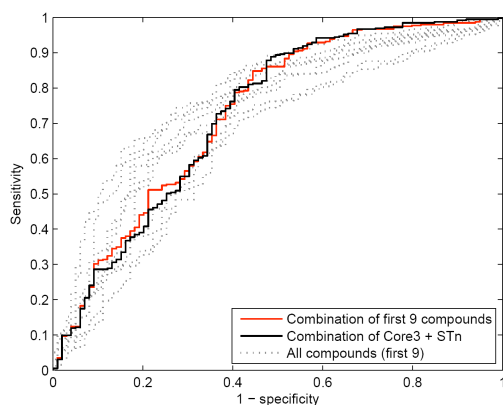

| Compound                 | Area  | Sera from patients with benign breast disease used to define cut-off |          |            |          | Area  | Sera from age-matched healthy females used to define cut-off |          |            |          |
|--------------------------|-------|----------------------------------------------------------------------|----------|------------|----------|-------|--------------------------------------------------------------|----------|------------|----------|
|                          |       | Mean + 2SD                                                           |          | Mean + 4SD |          |       | Mean + 2SD                                                   |          | Mean + 4SD |          |
|                          |       | Sens (%)                                                             | Spec (%) | Sens (%)   | Spec (%) |       | Sens (%)                                                     | Spec (%) | Sens (%)   | Spec (%) |
| MUC1                     | 0.726 | 2.03                                                                 | 97.22    | 1.01       | 99.07    | 0.788 | 11.14                                                        | 96.97    | 2.78       | 98.99    |
| TnMUC1                   | 0.695 | 2.03                                                                 | 99.07    | 0.76       | 99.07    | 0.744 | 5.57                                                         | 97.98    | 3.29       | 98.99    |
| STn MUC1*                | 0.727 | 11.14                                                                | 97.22    | 7.59       | 98.15    | 0.736 | 9.87                                                         | 97.98    | 6.84       | 97.98    |
| STMUC1                   | 0.693 | 3.04                                                                 | 99.07    | 2.53       | 99.07    | 0.699 | 9.87                                                         | 95.96    | 6.33       | 98.99    |
| C3MUC1*                  | 0.748 | 21.27                                                                | 94.44    | 17.97      | 98.15    | 0.693 | 10.13                                                        | 93.94    | 6.08       | 96.97    |
| C3S6MUC1*                | 0.714 | 14.18                                                                | 96.30    | 10.13      | 97.22    | 0.639 | 4.05                                                         | 96.97    | 2.28       | 98.99    |
| LeCC3MUC1*               | 0.755 | 8.10                                                                 | 96.30    | 6.08       | 97.22    | 0.692 | 7.59                                                         | 96.97    | 5.32       | 97.98    |
| SLeCC3MUC1               | 0.722 | 3.29                                                                 | 98.15    | 3.04       | 98.15    | 0.713 | 6.08                                                         | 98.99    | 3.54       | 98.99    |
| LeCC3S6MUC1*             | 0.773 | 6.58                                                                 | 98.15    | 2.78       | 98.15    | 0.784 | 6.08                                                         | 98.99    | 2.78       | 98.99    |
| Comb                     | 0.777 | 10.63                                                                | 97.22    | 4.81       | 99.07    | 0.730 | 10.63                                                        | 95.96    | 4.81       | 97.98    |
| Comb Subset C3 + STn (*) | 0.776 | 10.38                                                                | 97.22    | 4.56       | 100.0    | 0.726 | 10.38                                                        | 95.96    | 4.56       | 97.98    |
| C3Thr                    | 0.689 | 4.30                                                                 | 96.30    | 2.28       | 98.15    | 0.688 | 1.77                                                         | 96.97    | 1.27       | 97.98    |

\*MUC1 glycans in the Combination subset
